# Supplementary material for: SARS-CoV-2 and Adolescent Psychiatric Emergencies at the Tübingen University Hospital: Analyzing Trends, Diagnoses, and Contributing Factors
Source: MDPI journal article supplement (doi:10.3390/ijerph21020216), 2024-02-12
Supplement: s1 [file s1]

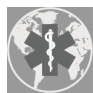

Article

# SARS-CoV-2 and Adolescent Psychiatric Emergencies at the Tübingen University Hospital: Analyzing Trends, Diagnoses, and Contributing Factors

Priska S. Schneider <sup>1,\*</sup>, Michelle Pantis <sup>1</sup>, Christine Preiser <sup>2,3</sup>, Daniela Hagmann <sup>1</sup>, Gottfried M. Barth <sup>1</sup>, Tobias J. Renner <sup>1,4</sup> and Katharina Allgaier <sup>1,4</sup>

## Supplementary Material

### Table S1: Coding Manual

Table S1. Indicators of risk/Specific reason for visit

| Subcategory          | Definition                                                                                                                               | Example (synthetic)                                                                                                                                                                                                                                |
|----------------------|------------------------------------------------------------------------------------------------------------------------------------------|----------------------------------------------------------------------------------------------------------------------------------------------------------------------------------------------------------------------------------------------------|
| suicidality          | Suicidal tendencies of the patient are named as an acute reason for presentation. Current suicide attempts are included here.            | The patient was admitted to our crisis intervention ward with increasing suicidal thoughts and concrete suicidal plans today.                                                                                                                      |
| suicide attempt      | The patient's reason for presentation is a recent suicide attempt.                                                                       | A. presented to the Children's Hospital, accompanied by the emergency services and her biological parents, for psychiatric assessment following a suicide attempt with 10 tablets of dextromethorphan 30 mg.                                       |
| self-harm            | The patient's reason for presentation is recent self-harm.                                                                               | Yesterday evening, he had injured himself in the room on the surface of his hand, as this would make him feel better.                                                                                                                              |
| risk to others       | The patient's reason for presentation is because they pose a danger to others. An act of violence has already occurred or is threatened. | The police reported that this was the third intervention in a short space of time due to conflicts with physical altercations in the domestic environment. In this case, they had been called out because A. had attacked his father with a knife. |
| psychotic symptoms   | The patient's reason for presentation is acute psychotic symptoms that are a danger to the patient themselves or to others.              | The patient presented with increasing psychotic development and increasing anxiety-ridden thoughts with ideas of poisoning and persecution by the mother after domestic escalation.                                                                |
| mental health crisis | The patient's reason for presentation is a reaction on an exceptional mental health crisis.                                              | A. was in a state of emergency, crying and screaming at the same time. In her rage, A. finally demanded to be admitted to the child and adolescent psychiatric ward.                                                                               |
| absenteeism          | The patient presents after being absent without permission or giving notice.                                                             | The patient was accompanied by the police after A. had left the group home the night before and had been in town with a fellow resident.                                                                                                           |
| underweight          | The patient's reason for presentation is being critically underweight.                                                                   | During the weight check, a further significant weight loss of >1.1 kg within one week was noted, which again indicated hospitalization.                                                                                                            |

|                           |                                                                                                                                                                          |                                                                                                                                                  |
|---------------------------|--------------------------------------------------------------------------------------------------------------------------------------------------------------------------|--------------------------------------------------------------------------------------------------------------------------------------------------|
| substance abuse           | The patient presents after using a poisonous substance or drug in a dangerous amount.                                                                                    | A. was admitted as an inpatient at the clinic due to tablet and alcohol intoxication.                                                            |
| pathological use of media | The patient presents after a major conflict about digital media. The conflicts arise from the unstoppable use of digital media or aggressiveness in restricting its use. | Previously, there had been a domestic escalation with the mother being beaten and threatened with a knife due to a conflict over cell phone use. |
| eating disorder symptoms  | The patient's reason for presentation is acute eating disorder symptoms. Underweight is included here.                                                                   | The mother of A. had last seen her daughter eat something 3 days ago.                                                                            |

### Stressors - school

| Subcategory                           | Definition                                                                                                                            | Example (synthetic)                                                                                                                                                                                                          |
|---------------------------------------|---------------------------------------------------------------------------------------------------------------------------------------|------------------------------------------------------------------------------------------------------------------------------------------------------------------------------------------------------------------------------|
| bullying                              | Bullying in school is mentioned as a factor that represents a burden for the patient.                                                 | She had experienced bullying at school for about a year, and intervention by the teacher had not yet brought about any change.                                                                                               |
| conflicts with classmates             | Conflicts with one or several classmates are mentioned as a factor that represents a burden for the patient.                          | There are often arguments with classmates at school.                                                                                                                                                                         |
| concentration problems                | Concentration problems in school are mentioned as a factor that represents a burden for the patient.                                  | She has difficulty concentrating in class.                                                                                                                                                                                   |
| decline in school related performance | A decline in school-related performance is mentioned as a factor that represents a burden for the patient.                            | It is understandable because he has difficulties at school (drop in performance) and does not receive the necessary support at home.                                                                                         |
| school related performance pressure   | School-related performance pressure is mentioned as a factor that represents a burden for the patient.                                | She was no longer used to attending school regularly after many absences before her inpatient stay on our youth ward and often lacked the motivation to go to school. She is afraid of failure and puts pressure on herself. |
| academic stress                       | Academic stress and overload at school are mentioned as factors that represent a burden for the patient.                              | He feels stressed about coping with every day (school) life.                                                                                                                                                                 |
| school absenteeism                    | The patient does not go to school at all or only rarely goes even though the patient should go to school due to compulsory schooling. | The argument was about him not wanting to go to school.                                                                                                                                                                      |
| school closure due to the pandemic    | The patient mentions the school closures due to the pandemic as a burden.                                                             | Since the school closures due to COVID-19, the situation has become acute.                                                                                                                                                   |

**Stressors - peers**

| Subcategory                         | Definition                                                                                                     | Example (synthetic)                                                                                                                                                      |
|-------------------------------------|----------------------------------------------------------------------------------------------------------------|--------------------------------------------------------------------------------------------------------------------------------------------------------------------------|
| social withdrawal                   | The patient isolates themselves from peers.                                                                    | He withdraws a lot into his room.                                                                                                                                        |
| no friends                          | The patient does not have any friends or states that they have no friends.                                     | She has no friends.                                                                                                                                                      |
| Conflicts with friends/relationship | Conflicts with friends or the relationship are mentioned as a factor that represents a burden for the patient. | She also had an argument with her roommate.                                                                                                                              |
| Relationship terminations           | Relationship terminations are mentioned as a factor that represents a burden for the patient.                  | However, A. reports that she broke up with her boyfriend about 3 weeks ago after she “messed up.”                                                                        |
| Concerns about friends              | Concerns about friends’ conditions are mentioned as a factor that represents a burden for the patient.         | The father adds that A. was affected by violence against her boyfriend a few days ago (stabbing by a person unknown to us, followed by surgery). She then confirms this. |

**Stressors – family**

| Subcategory                                         | Definition                                                                                                                                            | Example (synthetic)                                                                                                                      |
|-----------------------------------------------------|-------------------------------------------------------------------------------------------------------------------------------------------------------|------------------------------------------------------------------------------------------------------------------------------------------|
| conflict with a family member/caregiver             | Conflicts with a family member or a caregiver are mentioned as a factor that represents a burden for the patient.                                     | The main burden or cause of his negative thoughts are the conflicts with his father.                                                     |
| parent’s lack of understanding towards the children | The parents’ or caregivers’ lack of understanding toward the children’s condition are mentioned as a factor that represents a burden for the patient. | He feels misunderstood by his mother; she doesn’t care about his concerns and difficulties.                                              |
| parental conflicts                                  | Conflicts between the patient’s parents are mentioned as a factor that represents a burden for the patient.                                           | A. reported that the conflicts between her separated parents and the associated disputes about her vacations were a great burden on her. |
| parental separation                                 | The separation of the parents is mentioned as a factor that represents a burden for the patient.                                                      | She reported that she was often angry and sad about her parents’ separation and wished that her parents would get back together.         |

|                                                                    |                                                                                                                                                                                                                             |                                                                                                                                                                                                                                                          |
|--------------------------------------------------------------------|-----------------------------------------------------------------------------------------------------------------------------------------------------------------------------------------------------------------------------|----------------------------------------------------------------------------------------------------------------------------------------------------------------------------------------------------------------------------------------------------------|
| mental disorder, deviant behavior, or disability within the family | A high load on any family member is mentioned as a factor that represents a burden for the patient. This could be a mental disorder, disability, stress, or deviant behavior with the family member.                        | A. reported that her mother was doing better after A.'s last stay with us in March and that her mother had almost survived the treatment for breast cancer with chemotherapy and radiotherapy. Nevertheless, A. was still very worried about her mother. |
| history of abuse in the family                                     | There has been abuse within the family history of the patient.                                                                                                                                                              | A. cites additional stress factors, such as the experience of violence from the age of 3 by her mother's partner at the time.                                                                                                                            |
| violent confrontation                                              | There are violent confrontations between any family members.                                                                                                                                                                | In the last 2 weeks, the situation had escalated and the police had been called several times. A. had threatened to hit his father and had stabbed his mother in the arm with a pen.                                                                     |
| financial difficulties                                             | Financial difficulties in the family are mentioned as a factor that represents a burden for the patient.                                                                                                                    | Overall, the situation at home is tense due to the father's unemployment and corresponding financial bottlenecks.                                                                                                                                        |
| death                                                              | Death of any family member is mentioned as a factor that represents a burden for the patient.                                                                                                                               | In addition, his grandfather's funeral took place last week, but he did not attend it.                                                                                                                                                                   |
| out-of-home-placement (e.g., group home)                           | The patient describes the burden of out-of-home-placement (e.g., group home) or the fear of out-of-home-placement (e.g., group home). Also out-of-home-placement (e.g., group home) is mentioned in the physician's letter. | A. reported currently being burdened by not being able to live with her mother, but in the residential group.                                                                                                                                            |

### Stressors - self

| Subcategory       | Definition                                                                                                           | Example (synthetic)                                                                       |
|-------------------|----------------------------------------------------------------------------------------------------------------------|-------------------------------------------------------------------------------------------|
| sexuality         | Sexuality of the patient is mentioned as a factor that represents a burden for the patient.                          | He had realized that he was transsexual and had always suffered from being different.     |
| history of abuse  | There has been abuse in the history of the patient. The abuse was carried out by someone who is not a family member. | In 2020, A. had been sexually abused, which she had reported to her mother on 04.01.2022. |
| physical symptoms | Physical symptoms (e.g., aches or pains) are mentioned as a factor                                                   | She suffers from many physical complaints.                                                |

|                          |                                                                                                                                                                          |                                                                                                                                                                                                                                                   |
|--------------------------|--------------------------------------------------------------------------------------------------------------------------------------------------------------------------|---------------------------------------------------------------------------------------------------------------------------------------------------------------------------------------------------------------------------------------------------|
|                          | that represents a burden for the patient.                                                                                                                                |                                                                                                                                                                                                                                                   |
| covid                    | COVID-19 as the virus itself or the restrictions due to the pandemic are mentioned as a factor that represents a burden for the patient.                                 | Elisabeth cites the lockdown in March 2020 as a stress factor.                                                                                                                                                                                    |
| substance abuse          | The patient is abusing alcohol or drugs in a dangerous amount but is not currently in a dangerous situation.                                                             | He often consumes alcohol. He had lost consciousness 2-3 times so far and was so drunk that his parents had to locate him by cell phone.                                                                                                          |
| sleep disorders          | The patient suffers from sleep disorders.                                                                                                                                | Furthermore, the patient had been suffering from sleep complaints for a long period of time. The patient fell asleep with a significant delay (up to 5 hours), and her sleep through the night was disturbed, with pronounced daytime sleepiness. |
| loss of appetite         | The patient has a loss of appetite.                                                                                                                                      | She had noticed more loss of appetite and reduced energy again.                                                                                                                                                                                   |
| flashbacks               | The patient suffers from flashbacks and memories from bad experiences.                                                                                                   | She also said that she always had bad memories of her time in Iran. She always had images in her head.                                                                                                                                            |
| criminal behavior        | The patient acts criminally.                                                                                                                                             | A. and a friend were caught stealing clothes from a large fashion store chain by the store detective at lunchtime.                                                                                                                                |
| refugee                  | The patient is a refugee.                                                                                                                                                | A. had fled Turkey with her sister 3 weeks ago.                                                                                                                                                                                                   |
| risk to others           | The patient is a risk to others regularly or has been a risk to others in the near past. Here, this does not lead to the specific reason for the visit.                  | The presentation of 7;1 year old A. was accompanied by his mother for massive regulation and behavioral problems with kicking, biting, and hitting that would occur at home and at school.                                                        |
| mental health crisis     | The patient suffers from regular mental health crises or has had a mental health crisis in the near past. Here, this does not lead to the specific reason for the visit. | Attending school is currently not possible, as A. is experiencing more panic attacks there.                                                                                                                                                       |
| eating disorder symptoms | The patient suffers from eating disorder symptoms or has had eating disorder symptoms in the near past. This does not lead to the specific reason for the visit.         | She also has little appetite and eats very restrictively, partly because she doesn't like her body and partly because she wants to starve herself.                                                                                                |
| suicidality              | The patient has regular suicidal tendencies or has had suicidal thoughts in the near past. This                                                                          | She hurt herself and also had suicidal thoughts again and again.                                                                                                                                                                                  |

---

|           |                                                                                                                                               |                                                                                            |
|-----------|-----------------------------------------------------------------------------------------------------------------------------------------------|--------------------------------------------------------------------------------------------|
|           | does not lead to the specific reason for the visit.                                                                                           |                                                                                            |
| self-harm | The patient regularly injures themselves or has injured themselves in the near past. This does not lead to the specific reason for the visit. | Attending school is currently not possible as A. is experiencing more panic attacks there. |

---

**Personality characteristics**

| Subcategory                   | Definition                                                                                                                         | Example (synthetic)                                                                                                                                                           |
|-------------------------------|------------------------------------------------------------------------------------------------------------------------------------|-------------------------------------------------------------------------------------------------------------------------------------------------------------------------------|
| self-doubt                    | The patient directs doubt at themselves, their own thoughts, and their actions. This doubt is described for several areas of life. | A. had the feeling of "not being good enough for him."                                                                                                                        |
| impulsivity                   | The patient acts rashly and emotionally. This leads to conflicts. This is described for several areas of life.                     | There had been a fire alarm at around 5 p.m., which had been an unannounced change for A. and she had therefore reacted angrily and insisted on a nonprescribed escape route. |
| perfectionism                 | The patient is excessively striving for perfection. This is described for several areas of life.                                   | She also reported a perfectionist attitude toward herself.                                                                                                                    |
| high performance expectations | The patient has high expectations of themselves and their actions. This is described for several areas of life.                    | A. often puts pressure on herself to do well in school.                                                                                                                       |

**Table S2 Results of Qualitative Analysis**

|                          | Recurring factors                    | All time periods | Pre-SARS-CoV-2-pandemic | Restriction Phase 1 | Restriction Phase 2 | Endemic Phase |
|--------------------------|--------------------------------------|------------------|-------------------------|---------------------|---------------------|---------------|
| Reasons for presentation | Underweight                          | 3                | 2                       | 1                   | 0                   | 0             |
|                          | Eating disorder symptoms             | 9                | 1                       | 6                   | 2                   | 0             |
|                          | Pathological use of media            | 1                | 1                       | 0                   | 0                   | 0             |
|                          | Substance abuse                      | 22               | 6                       | 1                   | 5                   | 10            |
|                          | Absenteeism                          | 12               | 0                       | 0                   | 3                   | 9             |
|                          | Mental Health crisis                 | 11               | 1                       | 0                   | 0                   | 10            |
|                          | Self-injury                          | 34               | 6                       | 7                   | 6                   | 14            |
|                          | Psychotic symptoms                   | 15               | 0                       | 0                   | 2                   | 13            |
|                          | Risk to others                       | 28               | 10                      | 4                   | 3                   | 11            |
|                          | Suicide attempt                      | 19               | 3                       | 2                   | 5                   | 9             |
|                          | Suicidality                          | 96               | 14                      | 19                  | 17                  | 46            |
| Stressors - Peers        | Concerns about friends               | 1                | 0                       | 0                   | 0                   | 1             |
|                          | Relationship terminations            | 5                | 0                       | 1                   | 1                   | 3             |
|                          | Conflict with friends / relationship | 12               | 1                       | 0                   | 2                   | 9             |
|                          | No friends                           | 7                | 2                       | 2                   | 1                   | 2             |
|                          | Social withdrawal                    | 14               | 5                       | 4                   | 1                   | 4             |
| Stressors - School       | School closures due to the pandemic  | 1                | 0                       | 0                   | 0                   | 1             |
|                          | School absenteeism                   | 18               | 3                       | 3                   | 3                   | 9             |
|                          | Academic overwhelm                   | 10               | 2                       | 3                   | 1                   | 4             |
|                          | Performance pressure                 | 10               | 2                       | 3                   | 1                   | 4             |
|                          | Decline in performance               | 3                | 3                       | 0                   | 0                   | 0             |
|                          | Concentration problems               | 10               | 6                       | 1                   | 1                   | 2             |
|                          | Conflict with classmates             | 12               | 3                       | 2                   | 1                   | 6             |
|                          | Bullying                             | 18               | 5                       | 7                   | 5                   | 1             |
| Stressors – Family       | Out-of-home placement                | 29               | 4                       | 1                   | 6                   | 18            |
|                          | Deaths                               | 7                | 3                       | 3                   | 0                   | 1             |
|                          | Financial difficulties               | 1                | 0                       | 0                   | 1                   | 0             |
|                          | Violent confrontation                | 21               | 9                       | 3                   | 4                   | 5             |



|                                |                                                                    |    |    |   |   |    |
|--------------------------------|--------------------------------------------------------------------|----|----|---|---|----|
| Stressors -<br>Family          | History of abuse in the family                                     | 3  | 1  | 1 | 0 | 1  |
|                                | Mental disorder, deviant behavior, or disability within the family | 13 | 4  | 4 | 1 | 4  |
|                                | Parental separation                                                | 10 | 3  | 4 | 1 | 2  |
|                                | Parental conflicts                                                 | 2  | 1  | 1 | 0 | 0  |
|                                | Parent's lack of understanding towards the children                | 5  | 1  | 1 | 1 | 2  |
|                                | Conflict with family member / caregiver                            | 38 | 11 | 3 | 9 | 15 |
|                                |                                                                    |    |    |   |   |    |
| Stressors –<br>Self            | Psychotic symptoms                                                 | 1  | 1  | 0 | 0 | 0  |
|                                | Risk to others                                                     | 2  | 1  | 1 | 0 | 0  |
|                                | Mental Health Crisis                                               | 1  | 1  | 0 | 0 | 0  |
|                                | Absenteeism                                                        | 3  | 2  | 0 | 1 | 0  |
|                                | Eating disorder symptoms                                           | 4  | 0  | 2 | 2 | 0  |
|                                | Suicidality                                                        | 4  | 3  | 1 | 0 | 0  |
|                                | Self-injury                                                        | 10 | 5  | 4 | 1 | 0  |
|                                | Refugee                                                            | 1  | 0  | 0 | 0 | 1  |
|                                | Criminal behavior                                                  | 2  | 0  | 0 | 0 | 2  |
|                                | Flashbacks                                                         | 1  | 0  | 0 | 0 | 1  |
|                                | Loss of appetite                                                   | 3  | 0  | 1 | 0 | 2  |
|                                | Sleep disorders                                                    | 3  | 0  | 0 | 0 | 3  |
|                                | Substance abuse                                                    | 12 | 3  | 1 | 0 | 8  |
|                                | SARS-CoV-2-pandemic                                                | 1  | 0  | 1 | 0 | 0  |
|                                | Physical symptoms                                                  | 10 | 5  | 3 | 0 | 2  |
|                                | History of abuse in the biography                                  | 8  | 4  | 0 | 4 | 0  |
|                                | Sexuality                                                          | 4  | 0  | 1 | 1 | 2  |
|                                |                                                                    |    |    |   |   |    |
| Personality<br>characteristics | High performance expectations                                      | 3  | 1  | 0 | 0 | 2  |
|                                | Perfectionism                                                      | 1  | 1  | 0 | 0 | 0  |
|                                | Impulsivity                                                        | 6  | 1  | 1 | 1 | 3  |
|                                | Self-doubt                                                         | 5  | 0  | 3 | 1 | 1  |
